# Supplementary material for: Design of biodegradable bi-compartmental microneedles for the stabilization and the controlled release of the labile molecule collagenase for skin healthcare
Source: Royal Society of Chemistry journal article supplement (doi:10.1039/d0tb02279a), 2020-12-07
Supplement: d0tb02279a1.pdf [file d0tb02279a1.pdf]

## Supporting Information

### Design of biodegradable bi-compartmental microneedles for the stabilization and the controlled release of the labile molecule collagenase for skin healthcare

Concetta Di Natale <sup>§ a,b</sup>, Domenico De Rosa <sup>§ a</sup>, Martina Profeta <sup>a</sup>, Rezvan Jamaledin <sup>a</sup>, Alessandro Attanasio <sup>a</sup>, Elena Lagreca <sup>a</sup>, Pasqualina Liana Scognamiglio <sup>a</sup>, Paolo Antonio Netti <sup>a,b</sup> and Raffaele Vecchione<sup>1</sup> \* <sup>a</sup>.

<sup>a</sup> Center for Advanced Biomaterials for HealthCare@CRIB, Istituto Italiano di Tecnologia, Largo Barsanti e Matteucci 53, Napoli 80125, Italy

<sup>b</sup> Interdisciplinary Research Center of Biomaterials, CRIB, University Federico II, P.le Tecchio 80, Naples 80125, Italy

<sup>§</sup> These authors contributed equally

\* Correspondence should be addressed to Ing.PhD Raffaele Vecchione

E-mail: [Raffaele.vecchione@iit.it](mailto:Raffaele.vecchione@iit.it)

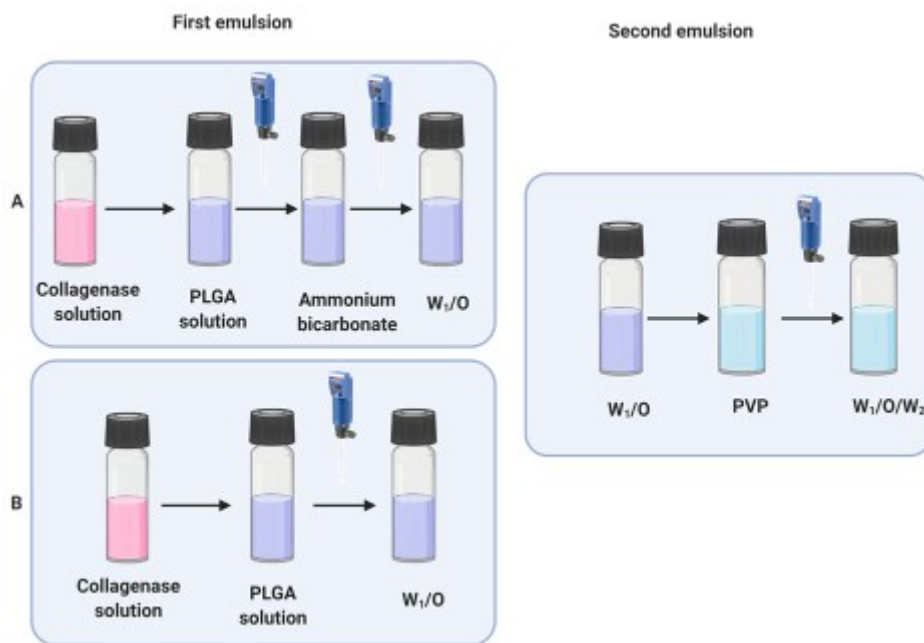

**Figure S1:** Collagenase MPs production with (A) and without (B) porogenic agent

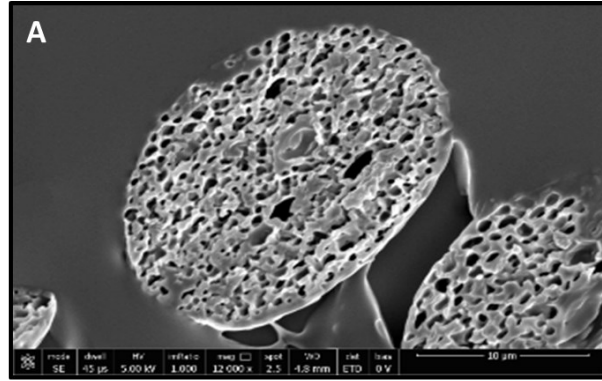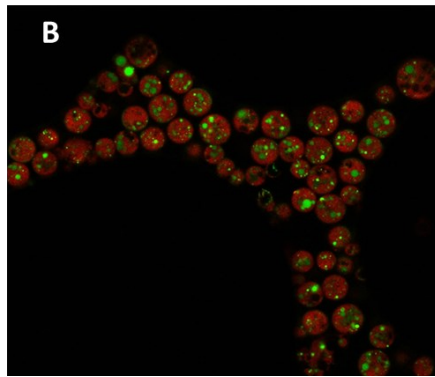

**Figure S2:** Morphological characterization of Collagenase-standard. A) SEM microscopy, B) Confocal analysis: Fluorescence images were acquired using a  $\lambda_{\text{exc}}$  of 488 nm and a  $\lambda_{\text{emiss}}$  between 500 and 600 nm. Red signal is related to PLGA acquired in DAPI range.

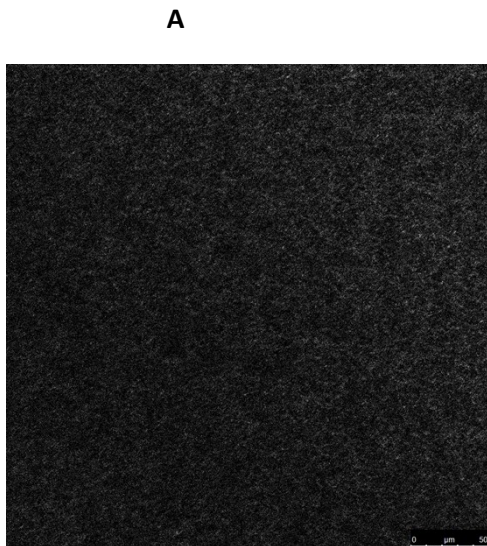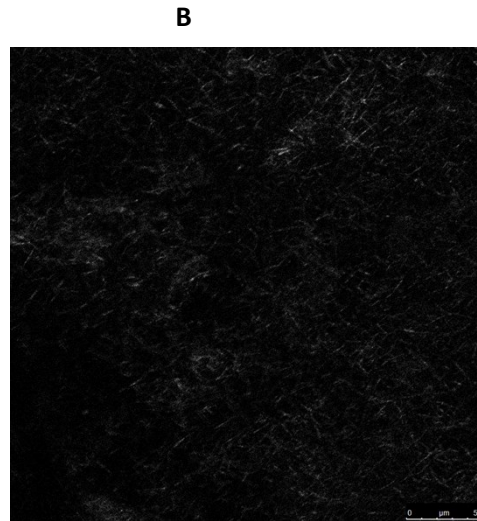

**Figure S3:** Z-stack analysis of A) control sample and B) treated collagen.

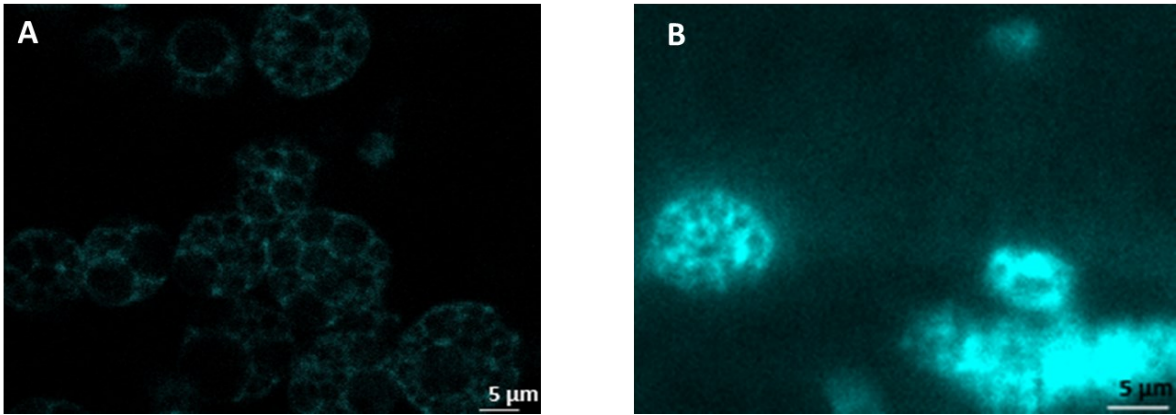

**Figure S4:** MPs before (A) and after microneedle production process (B).

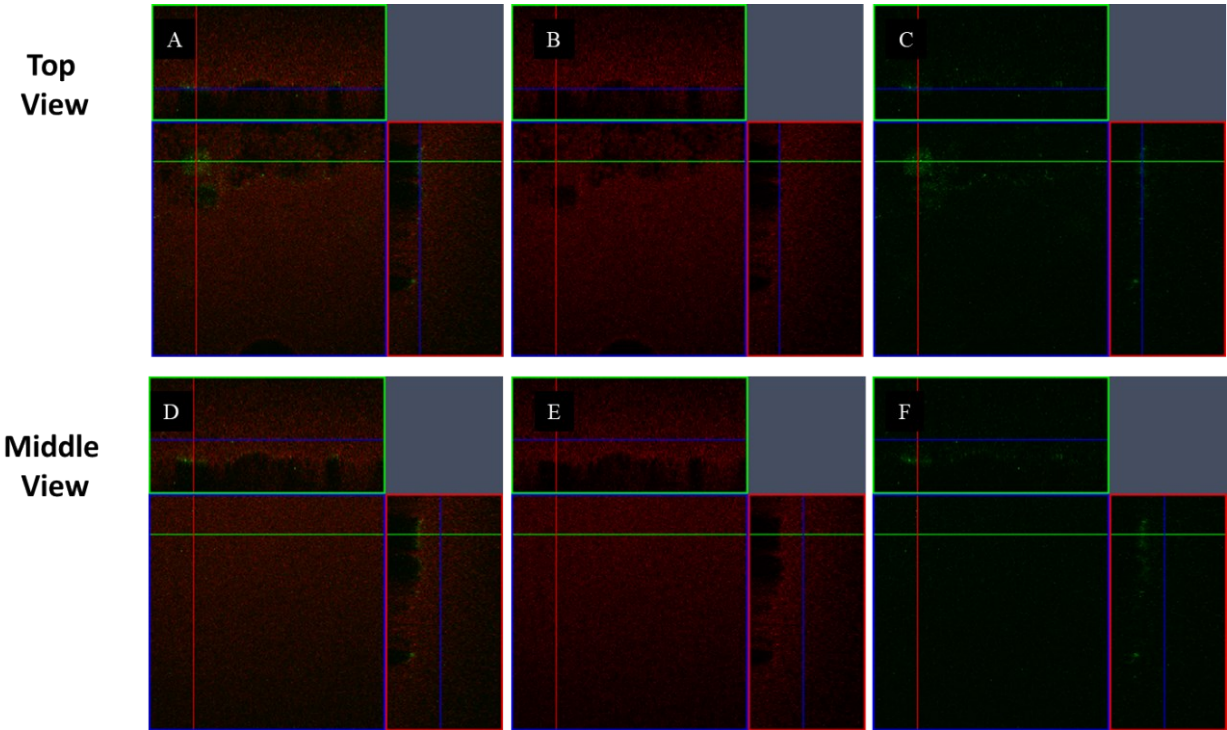

**Figure S5:** Release test of 600  $\mu\text{m}$  microneedles loaded with the Standard MPs in the in vitro skin equivalent model after 30 min; top and middle view. A-D) Merge of green and red channels; B-E) red channel; C-F) green channel.

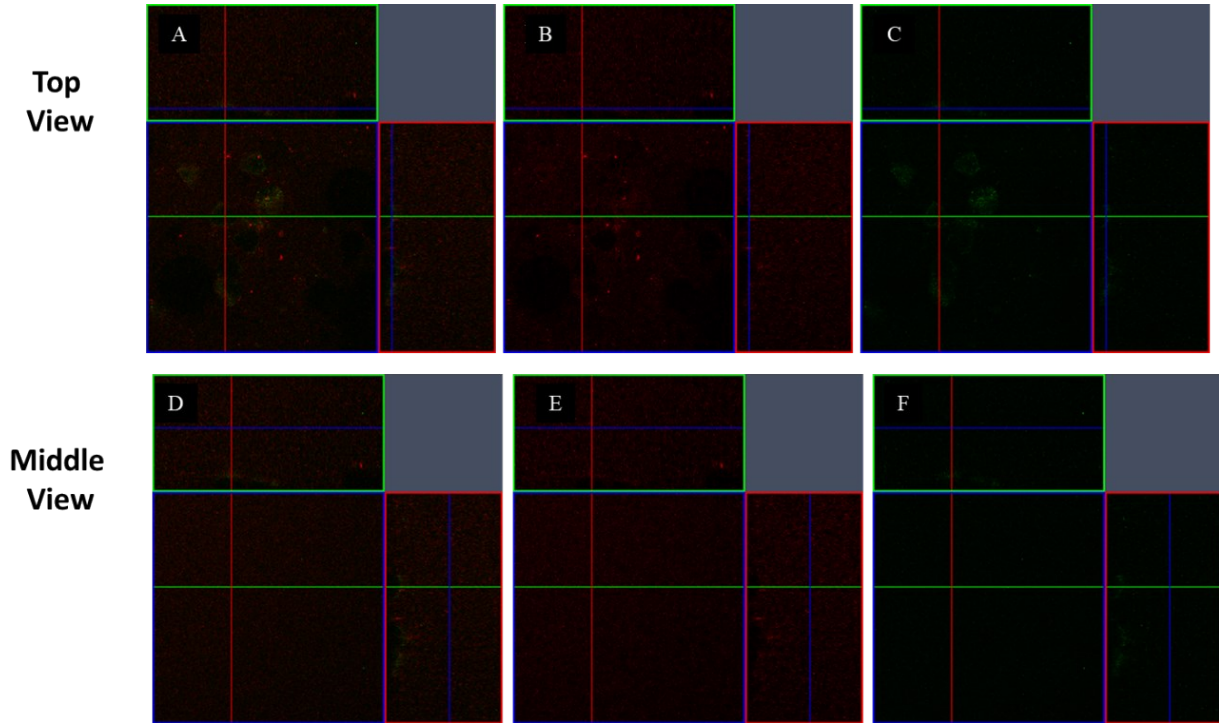

**Figure S6:** Release test of 600  $\mu\text{m}$  microneedles loaded with the Standard MPs in the in vitro skin equivalent model after 2h; top and middle view. A-D) Merge of green and red channels; B-E) red channel; C-F) green channel.

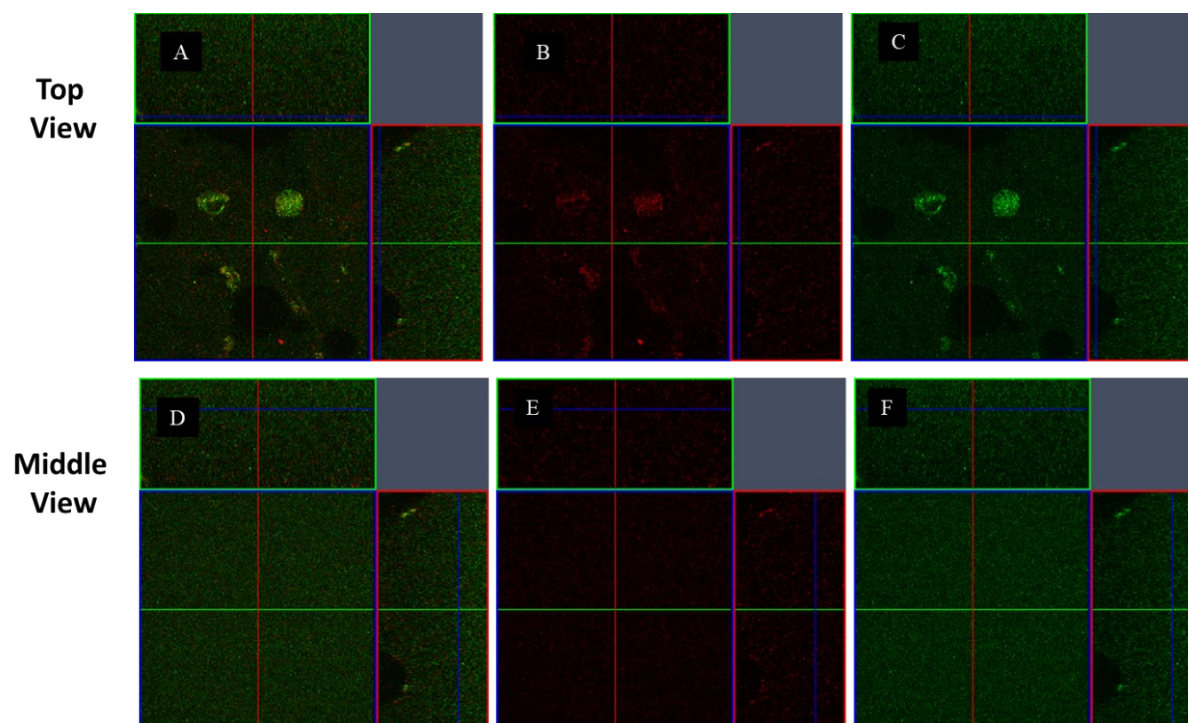

**Figure S7:** Release test of 600  $\mu\text{m}$  microneedles loaded with the Standard MPs in the in vitro skin equivalent model after 24h; top and middle view. A-D) Merge of green and red channels; B-E) red channel; C-F) green channel.

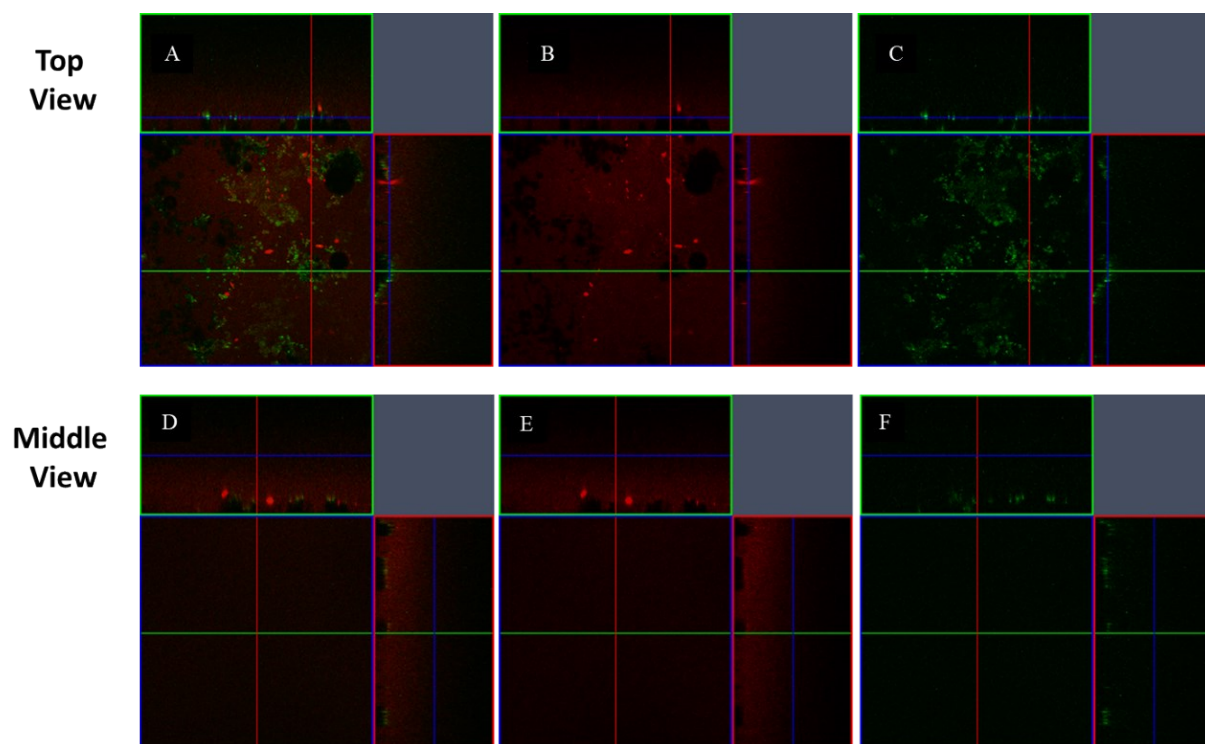

**Figure S8:** Release test of 600  $\mu\text{m}$  microneedles loaded with the ABC- MPs in the in vitro skin equivalent model after 30 min; top and middle view. A) Merge of green and red channels; B) red channel; C) green channel.

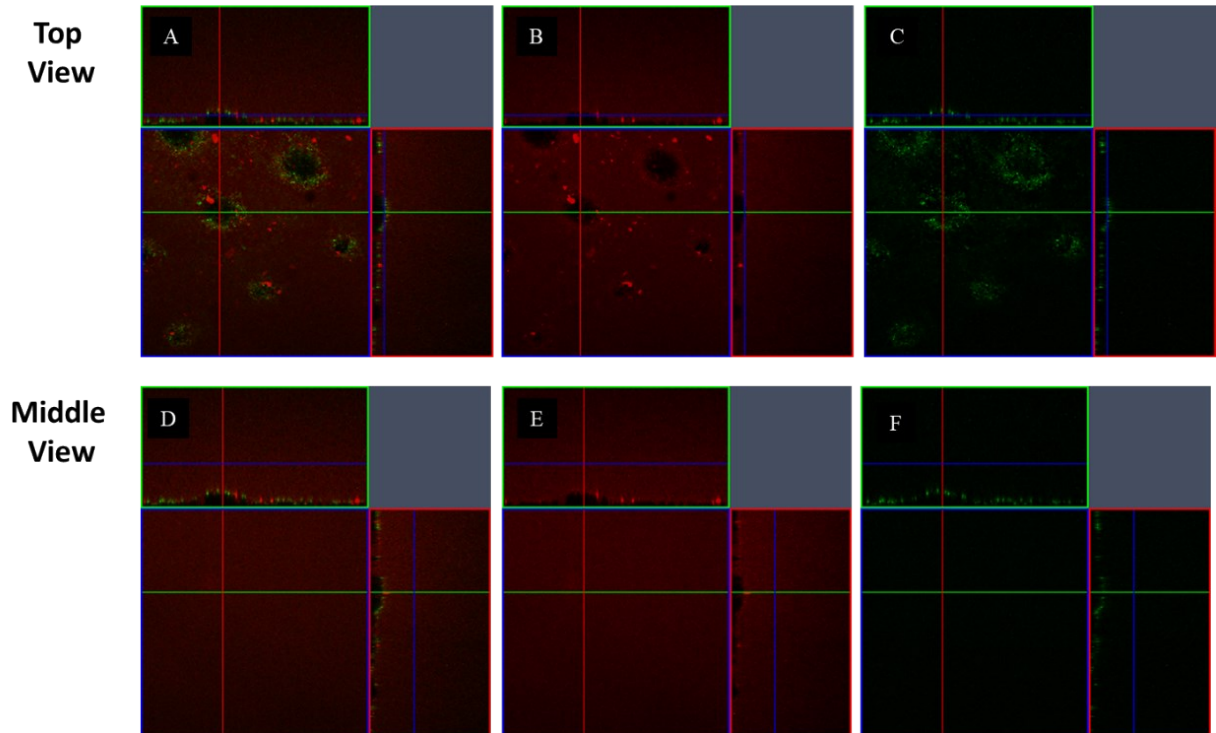

**Figure S9:** Release test of 600  $\mu\text{m}$  microneedles loaded with the ABC- MPs in the in vitro skin equivalent model after 2h; top and middle view. A-D) Merge of green and red channels; B-E) red channel; C-F) green channel.

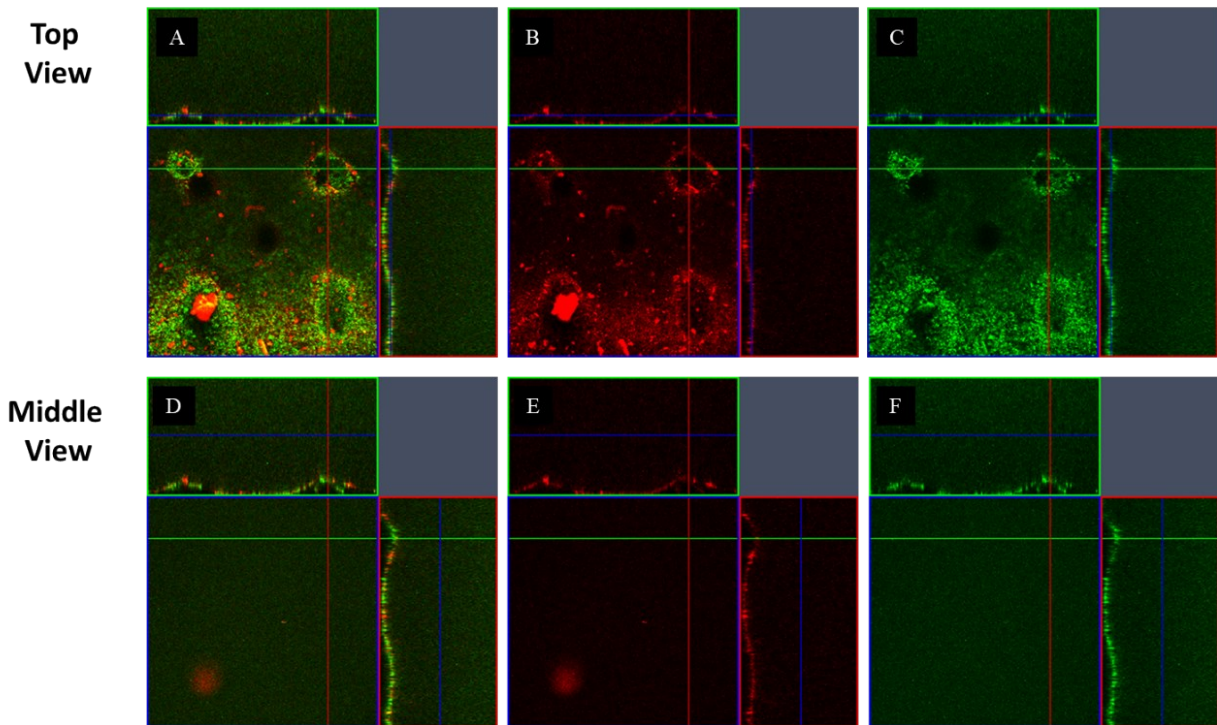

**Figure S10:** Release test of 600  $\mu\text{m}$  microneedles loaded with the ABC- MPs in the in vitro skin equivalent model after 24h; top and middle view. A-D) Merge of green and red channels; B-E) red channel; C-F) green channel.

**Table S1.** Degree of loading (DOL) and % of activity of Collagenase after ATTO-488 and ATTO-740 conjugation.

| <b>Collagenase</b> | <b>DOL</b> | <b>% Activity</b> |
|--------------------|------------|-------------------|
| ATTO-488           | 2          | 70.26±0.2         |
| ATTO-740           | 1.67       | 9.17±2.1          |

**Table S2.** Collagenase ABC and standard MPs features.

| <b>Collagenase -488<br/>MPs</b> | <b>% <math>\eta</math></b> | <b>% Release<br/>in 2h</b> | <b>D<sub>average</sub><br/>(<math>\mu\text{m}</math>)</b> |
|---------------------------------|----------------------------|----------------------------|-----------------------------------------------------------|
| ABC                             | 93.43± 4.0                 | 39.57±2.29                 | 13.23±9.5                                                 |
| Standard                        | 23.86± 2.3                 | 8.45±1.08                  | 9.62±4.61                                                 |
